# Supplementary material
Source: PubMed Central journal article supplement (PMC7006709)

SUPPLEMENTAL MATERIAL

**Supplemental Table 1:** Lists of codes (listed in the primary procedure field) for identifying procedures of interest

| <b>TAVR</b>                  |                                                                                                                                                                                                              |                           |
|------------------------------|--------------------------------------------------------------------------------------------------------------------------------------------------------------------------------------------------------------|---------------------------|
| <b>Ontario (ICD10 CCI)</b>   | <b>Description</b>                                                                                                                                                                                           | <b>NY (ICD9 CM)</b>       |
| 1.HV.90.GP-XX-L <sup>1</sup> | Excision total with reconstruction, aortic valve, replacement of valve alone with xenograft tissue valve [e.g. bovine or porcine tissue] using percutaneous transluminal (arterial) (retrograde) approach.   | 35.05, 35.06 <sup>2</sup> |
| 1.HV.90.GR-XX-L              | Excision total with reconstruction, aortic valve replacement of valve alone with xenograft tissue valve [e.g. bovine or porcine tissue] using percutaneous transluminal transeptal approach.                 |                           |
| 1.HV.90.ST-XX-L              | Excision total with reconstruction, aortic valve, replacement of valve alone with xenograft tissue valve [e.g. bovine or porcine tissue] using open approach with closed heart technique [transventricular]. |                           |

| <b>LVAD</b>                |                                                                                           |                     |
|----------------------------|-------------------------------------------------------------------------------------------|---------------------|
| <b>Ontario (ICD10 CCI)</b> | <b>Description</b>                                                                        | <b>NY (ICD9 CM)</b> |
| 1HP53LAQP <sup>1</sup>     | Implantation of internal device, ventricle of ventricular assist pump using open approach | 37.66 <sup>3</sup>  |

| <b>EVAR</b>                                                                                                        |                    |                                                                                                  |
|--------------------------------------------------------------------------------------------------------------------|--------------------|--------------------------------------------------------------------------------------------------|
| <b>Ontario (ICD10 CCI)</b>                                                                                         | <b>Description</b> | <b>NY (ICD9 CM)</b>                                                                              |
| 1.KA.80.GQ-NRN <sup>4</sup><br><br>Can be stratified into I71.3 (ruptured) or I71.4 (intact) for subgroup analysis |                    | 39.71 <sup>5</sup> (can be stratified into intact 441.4 or ruptured 441.3) for subgroup analysis |

## References

1. Interprovincial Health Insurance Agreements Coordinating Committee *Interprovincial Billing Rates for High Cost Procedures Effective for discharges on or after April 1, 2016 FINAL* 2016. Available at: [http://www.health.gov.on.ca/en/pro/programs/ohip/bulletins/na\\_69/na\\_69\\_2.pdf](http://www.health.gov.on.ca/en/pro/programs/ohip/bulletins/na_69/na_69_2.pdf) [Accessed December 4, 2019].
2. Kolte D, Khera S, Sardar MR, Gheewala N, Gupta T, Chatterjee S, Goldsweig A, Aronow WS, Fonarow GC, Bhatt DL, Greenbaum AB, Gordon PC, Sharaf B, Abbott JD. Thirty-Day Readmissions After Transcatheter Aortic Valve Replacement in the United States: Insights From the Nationwide Readmissions Database. *Circulation Cardiovascular interventions*. 2017;10: e004472.
3. Khazanie P, Hammill BG, Patel CB, Eapen ZJ, Peterson ED, Rogers JG, Milano CA, Curtis LH, Hernandez AF. Trends in the use and outcomes of ventricular assist devices among medicare beneficiaries, 2006 through 2011. *J Am Coll Cardiol*. 2014;63:1395-1404.
4. Jetty P, Hebert P, van Walraven C. Long-term outcomes and resource utilization of endovascular versus open repair of abdominal aortic aneurysms in Ontario. *J Vasc Surg*. 2010;51:577-583, 583.e571-573.
5. Schermerhorn ML, Bensley RP, Giles KA, Hurks R, O'malley AJ, Cotterill P, Chaikof E, Landon BE. Changes in abdominal aortic aneurysm rupture and short-term mortality, 1995-2008: a retrospective observational study. *Ann Surg*. 2012;256:651-658.

Supplemental Table 2: EVAR, LVAD, and TAVR annual volumes in Ontario and New York 2012-2015

(red= Ontario, blue= New York)

| Procedure   | Calendar year |      |      |                    |       |
|-------------|---------------|------|------|--------------------|-------|
|             | 2012          | 2013 | 2014 | 2015 (Jan to Sept) | Total |
| <b>EVAR</b> | 897           | 900  | 859  | 666                | 3322  |
|             | 1716          | 1702 | 1740 | 1202               | 6360  |
| <b>LVAD</b> | 33            | 34   | 32   | 40                 | 139   |
|             | 179           | 179  | 197  | 141                | 696   |
| <b>TAVR</b> | 245           | 427  | 564  | 486                | 1722  |
|             | 599           | 1139 | 1596 | 1528               | 4853  |

Supplemental Table 3: Age and sex standardized EVAR, LVAD, and TAVR utilization (procedures per-100,000 population per-year) Ontario and New York 2012-2015 (Ontario red, New York Blue)

| Procedure | Calendar year |      |      |       |
|-----------|---------------|------|------|-------|
|           | 2012          | 2013 | 2014 | 2015* |
| EVAR      | 13.0          | 13.0 | 12.4 | 12.8  |
|           | 20.3          | 20.2 | 20.7 | 19.0  |
| LVAD      | 0.3           | 0.3  | 0.3  | 0.5   |
|           | 1.3           | 1.3  | 1.4  | 1.3   |
| TAVR      | 3.5           | 6.2  | 8.2  | 9.0   |
|           | 6.6           | 12.4 | 17.7 | 22.7  |

---

\* Data from January-September 2015, annualized

Supplemental Table 4: Insurance coverage of EVAR, LVAD and TAVR recipients in New York State

|                                | EVAR (N=6360) | LVAD (N=696) | TAVR (N=4853) |
|--------------------------------|---------------|--------------|---------------|
| Medicare, number (%)           | 5096 (80.1)   | 316 (45.4)   | 4523 (93.2)   |
| Private, number (%)            | 967 (15.2)    | 255 (36.6)   | 236 (4.9)     |
| Medicaid, number (%)           | 182 (2.9)     | 117 (16.8)   | 50 (1.0)      |
| Uninsured/self-pay, number (%) | 51 (0.8)      | SC*          | 20 (0.4)      |
| Other, number (%)              | 64 (1.0)      | SC*          | 24 (0.5)      |

---

\*SC = small cells, cells <6 for Ontario and <10 for NY can not be identified due to privacy regulations

Supplemental Figure 1: Flow diagrams for creation of Ontario cohorts for

a) EVAR Ontario

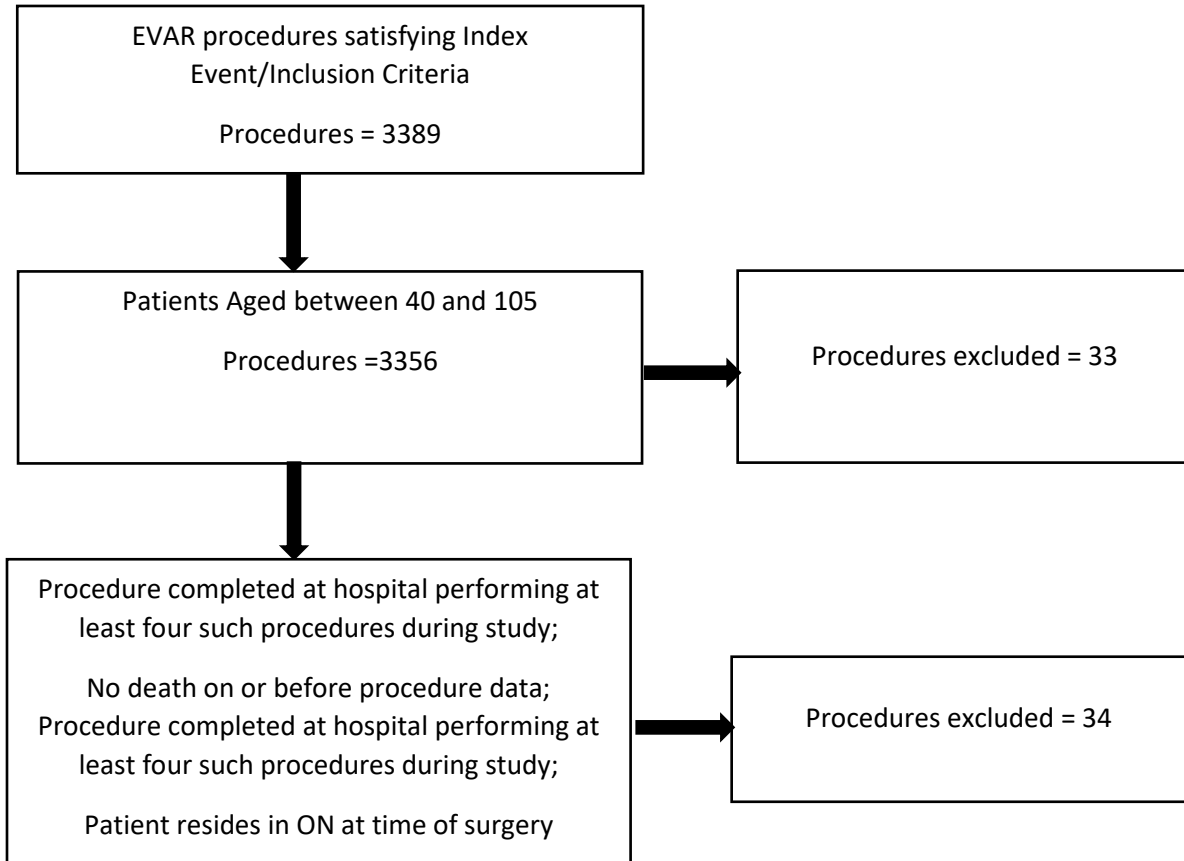

Final Cohort: 3295 patients contributing 3322 procedures

b) LVAD Ontario

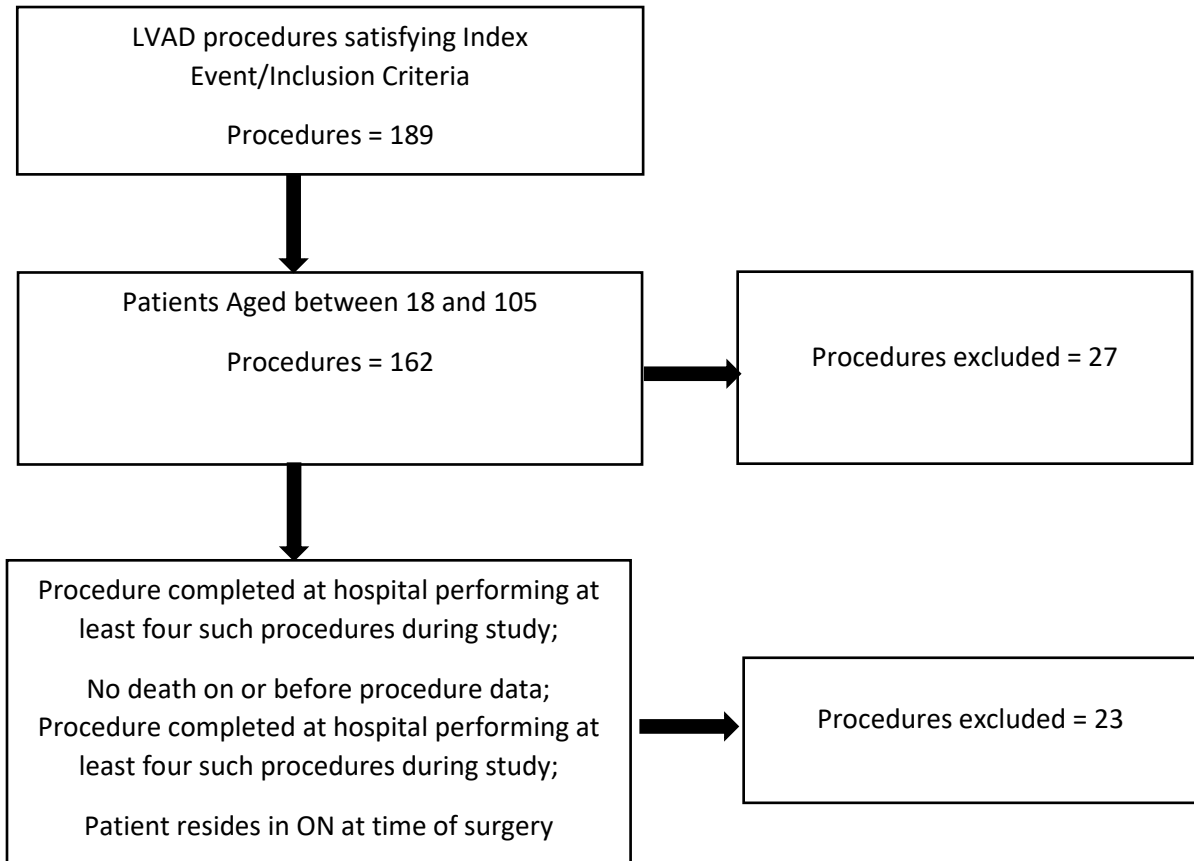

Final Cohort: 136 patients contributing 139 procedures



c) TAVR Ontario

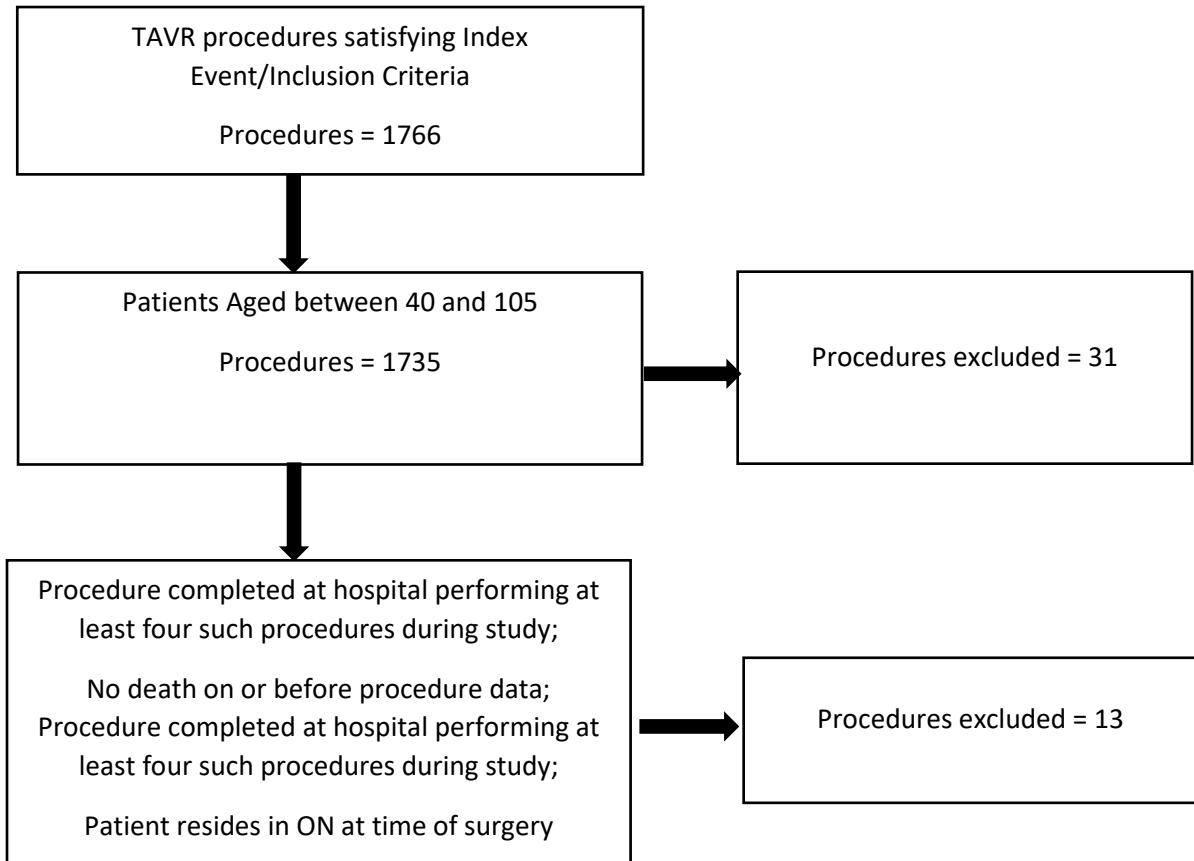

Final Cohort: 1708 patients contributing 1722 procedures

Supplemental Figure 2: Flow diagrams for creation of NY cohorts for

a) EVAR NY

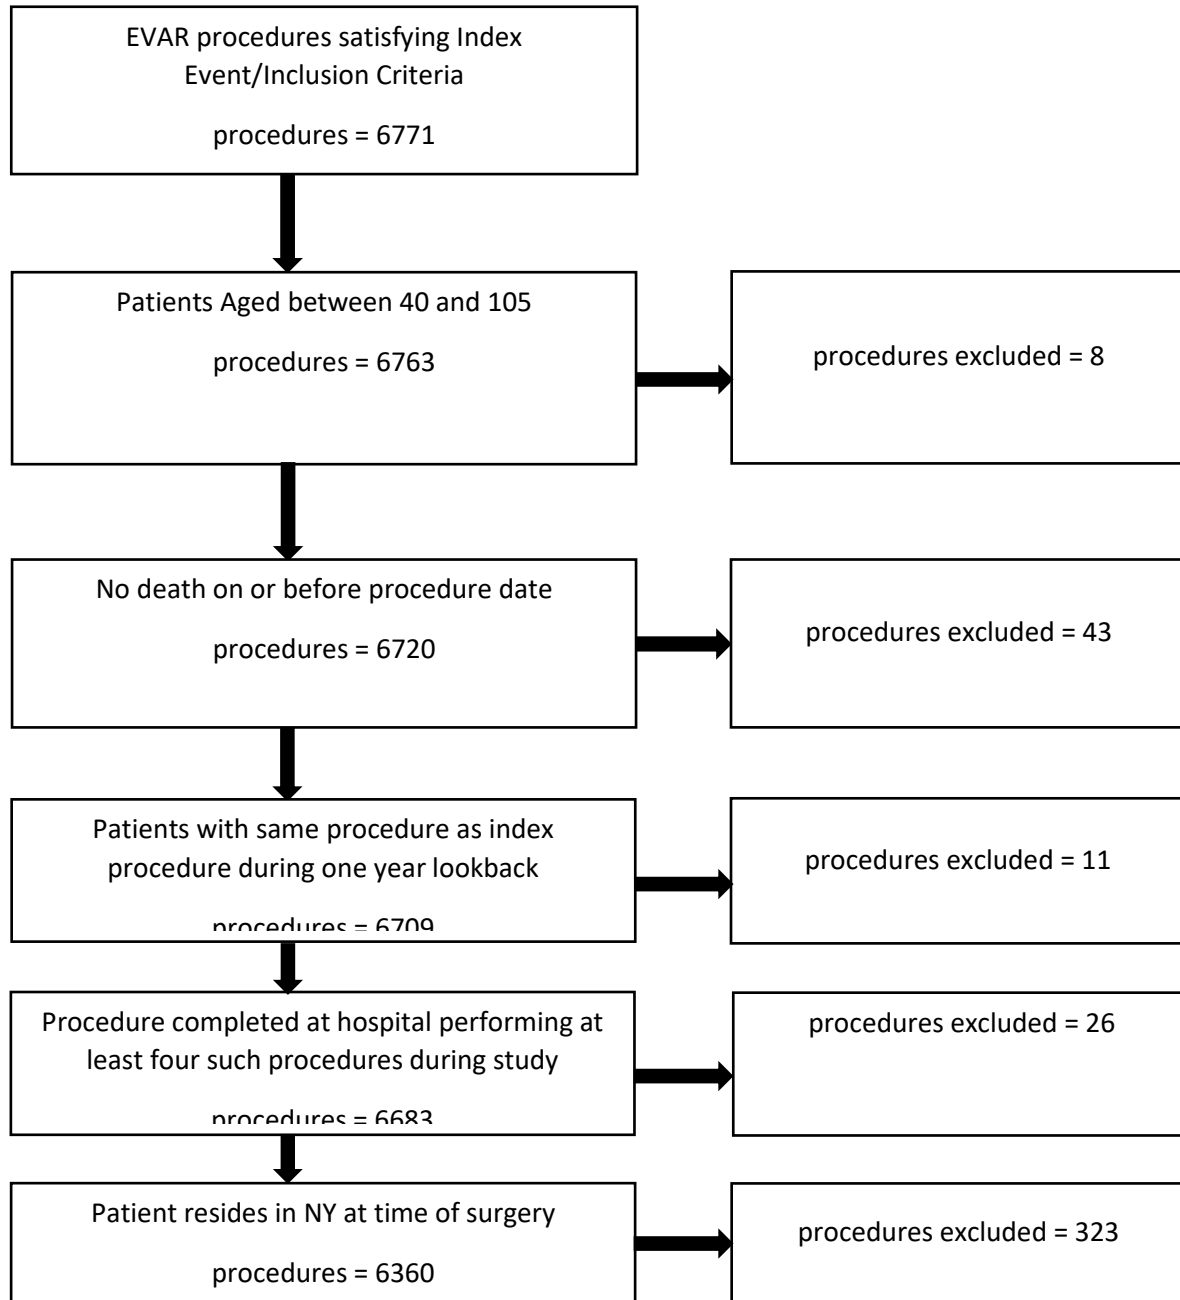

Final Cohort: 6236 patients contributing 6360 procedures

b) LVAD NY

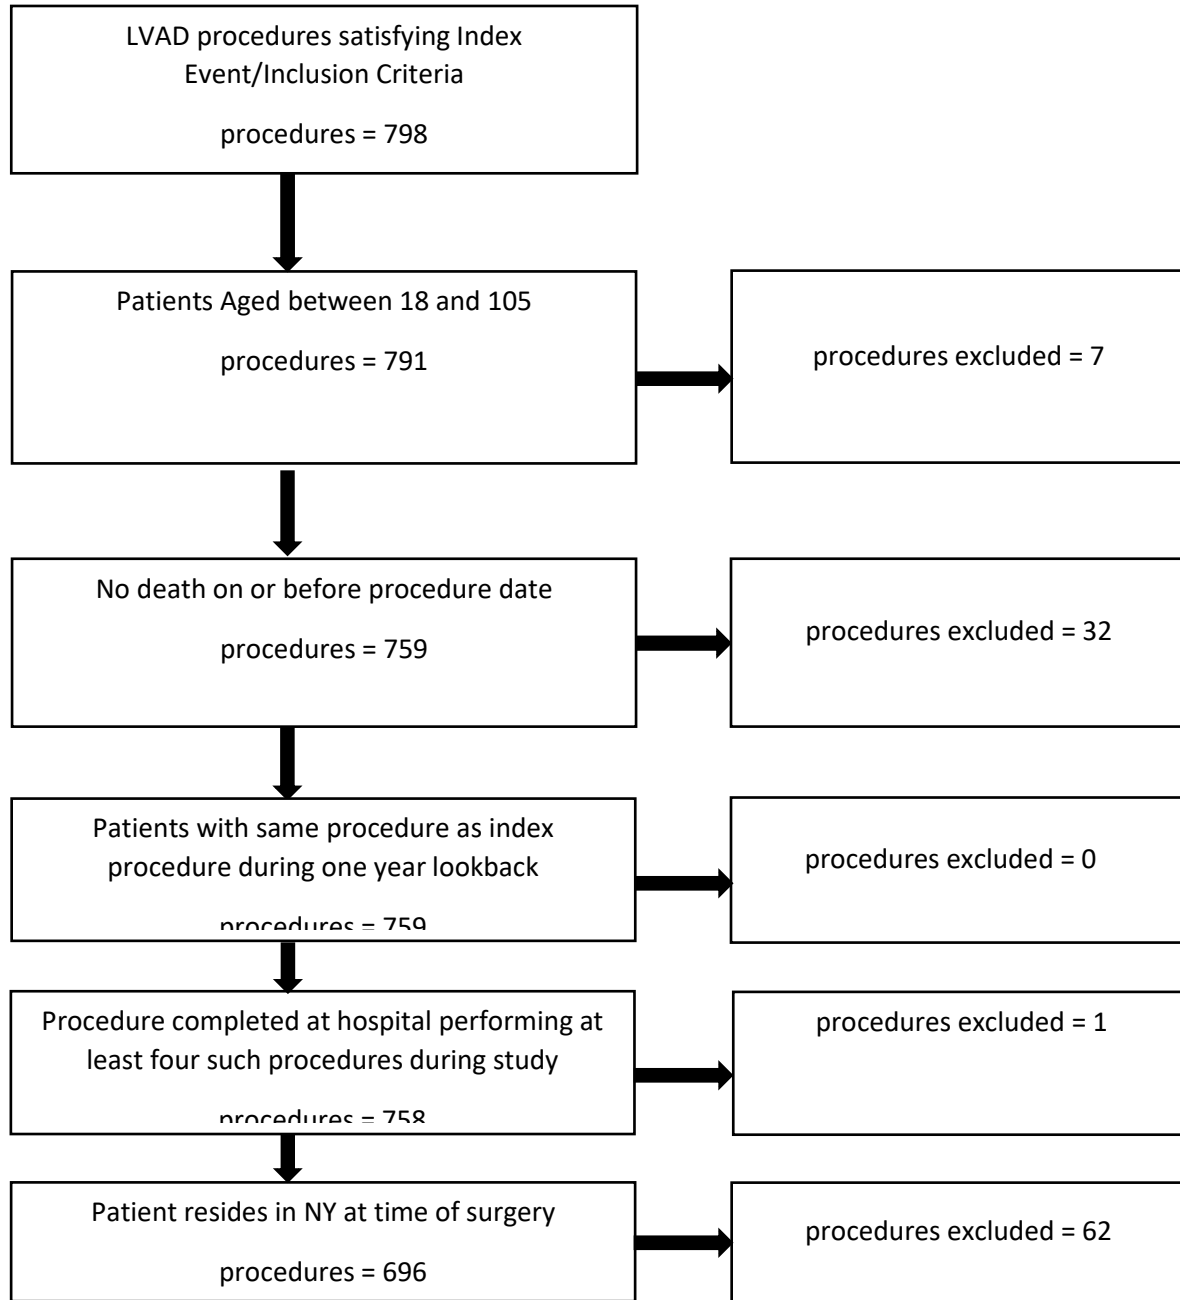

Final Cohort: 686 patients contributing 696 procedures

c) TAVR NY

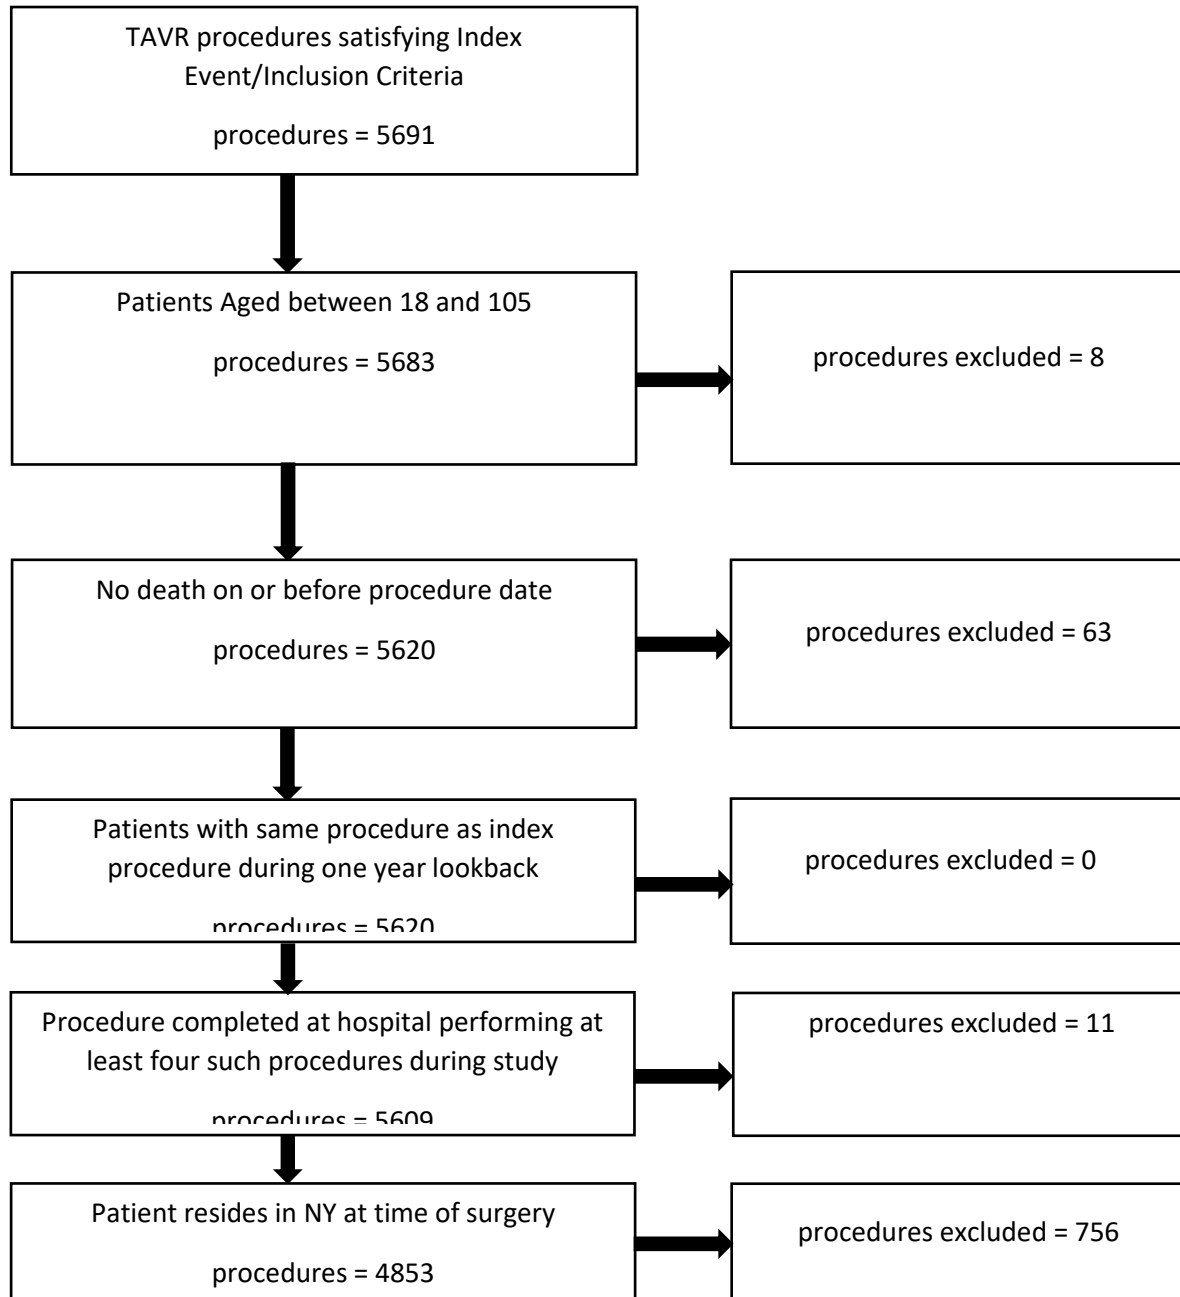

Final Cohort: 4838 patients contributing 4853 procedures

Supplemental Figure 3: Standardized utilization of EVAR, LVAD, and TAVR stratified by patient age

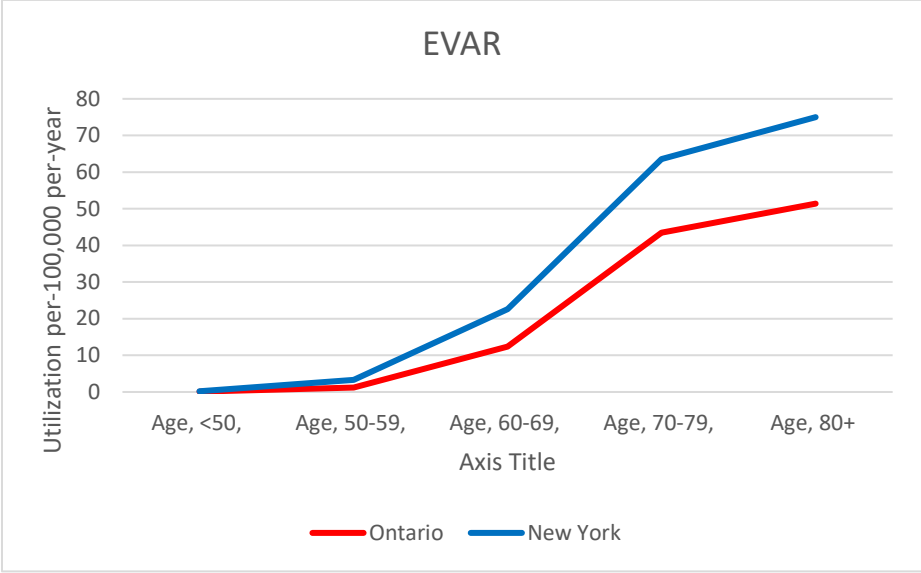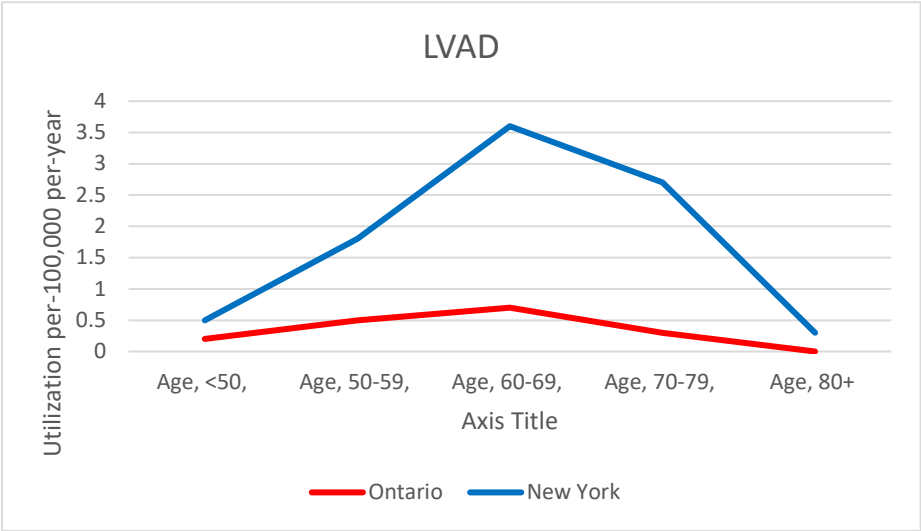

# TAVR

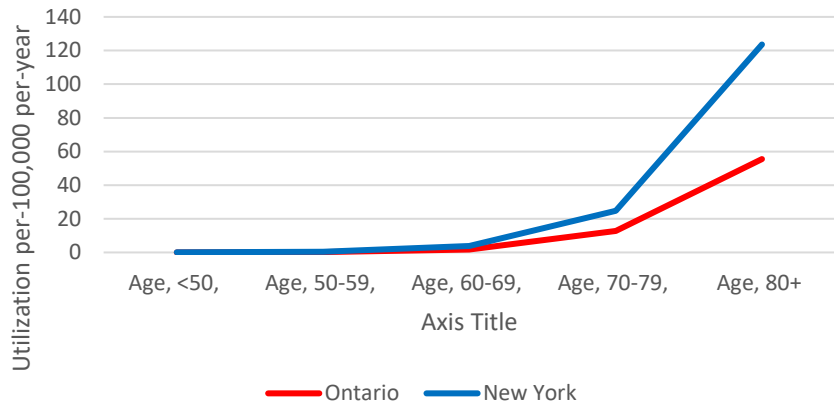

Supplemental Figure 4: Standardized utilization of EVAR, LVAD, and TAVR by calendar year

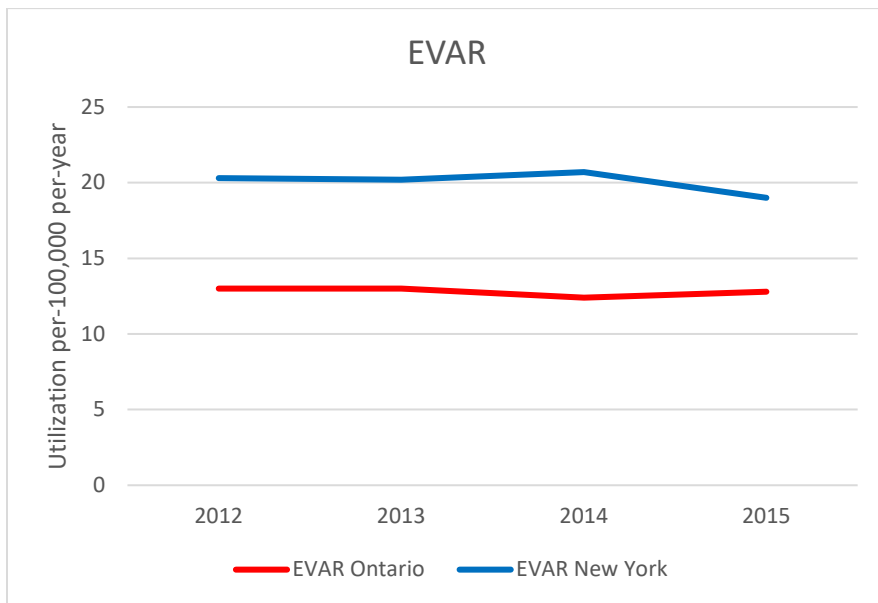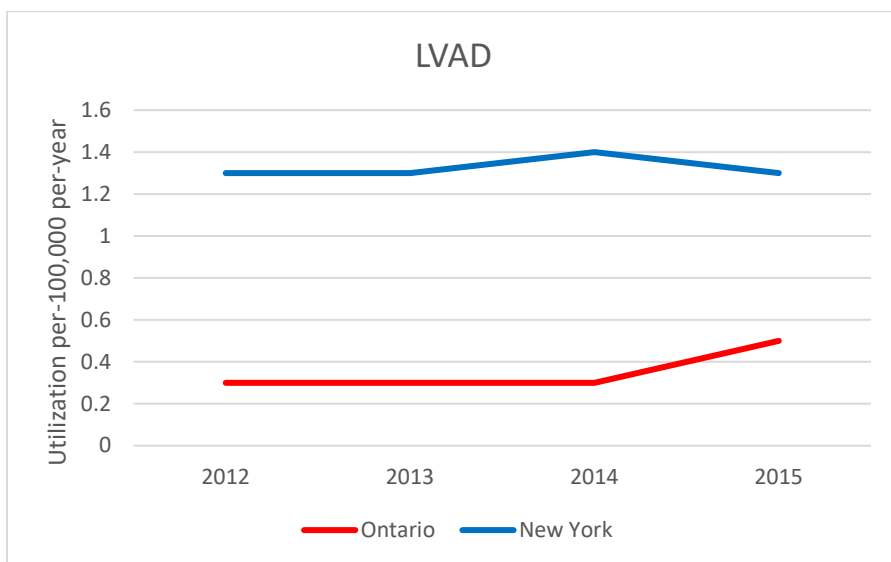

### TAVR

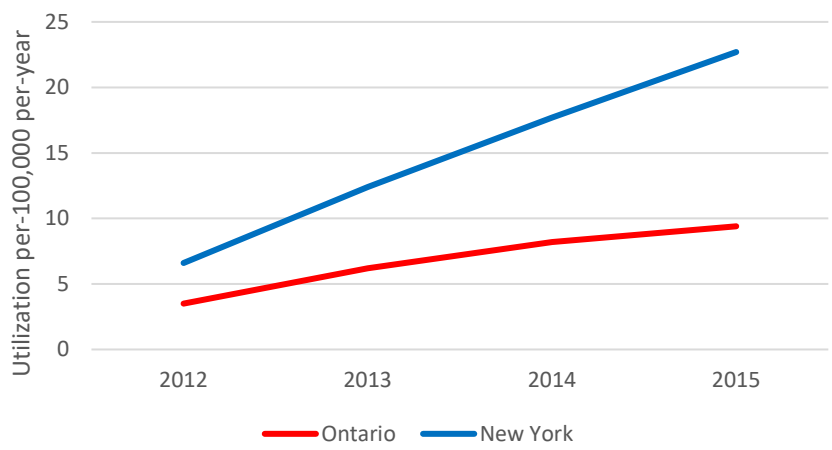

Supplement: NIHMS1549514-supplement-Supplemental_Material.pdf [file NIHMS1549514-supplement-Supplemental_Material.pdf]
